# Supplementary material
Source: publisher figshare collection journal article supplement (https://springernature.figshare.com/ndownloader/files/20077988)

## Additional File 5

**Figure A5:** Scatterplots of concordance correlation coefficients between reader 1 and reader 2 at the Time 1 and at Time 2 regarding darkest part of the tumor (DpTu) apparent diffusion coefficient (ADC) maximum (A,B), DpTu ADC mean (C,D), and DpTu ADC minimum (E,F).

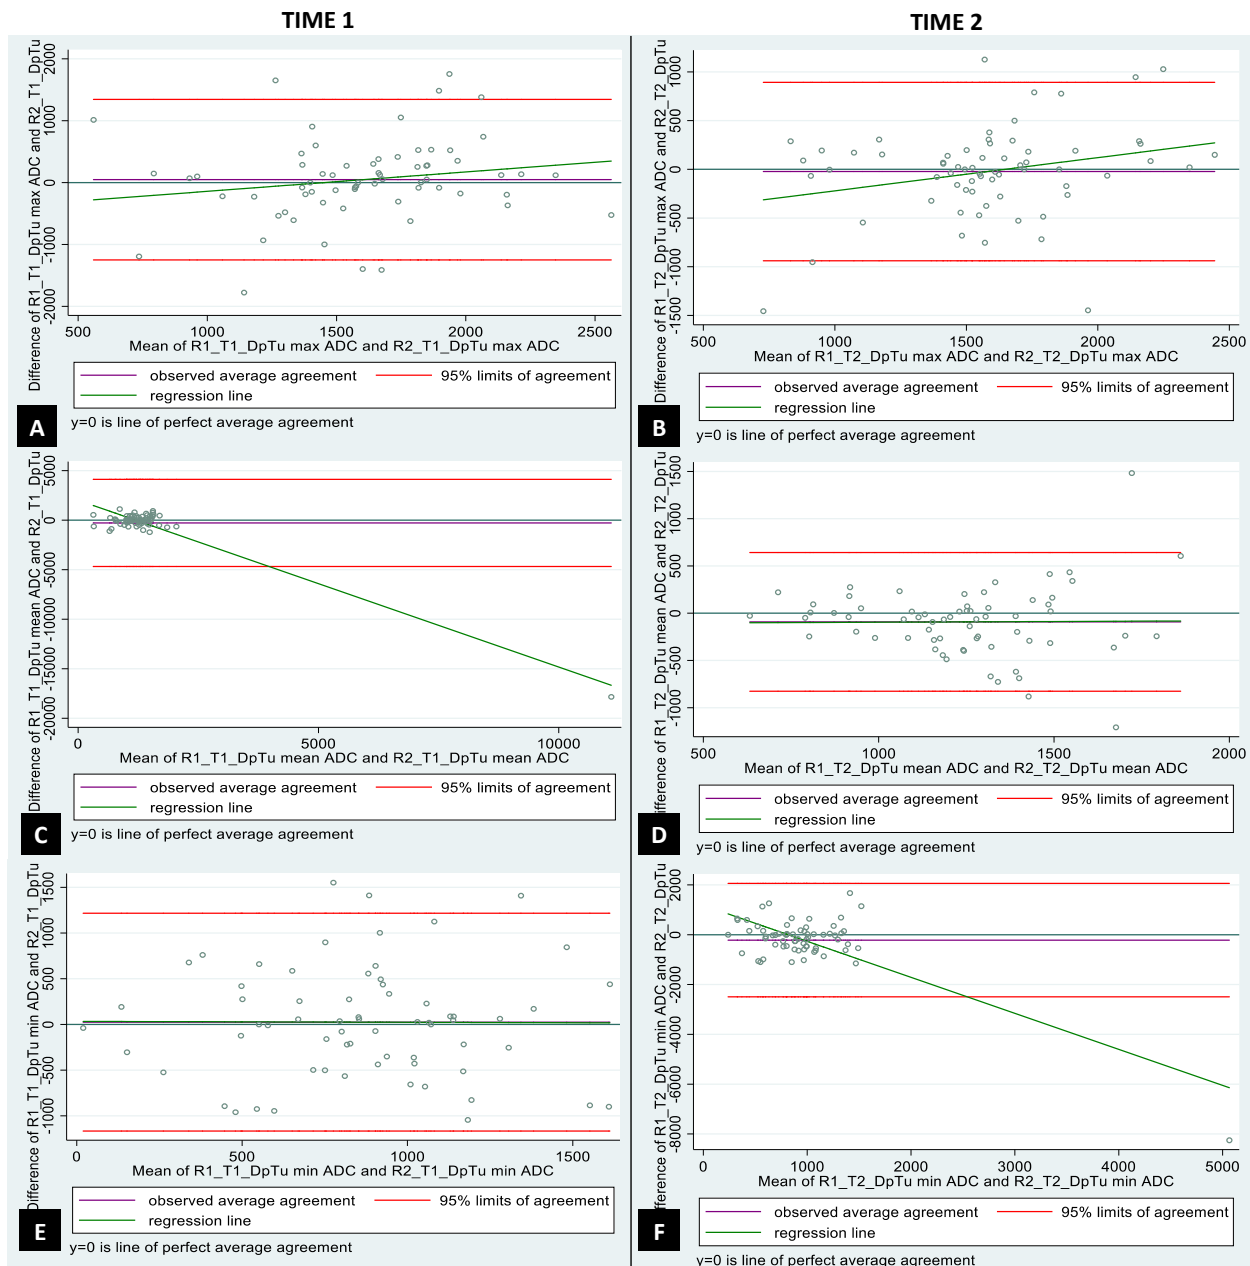

Supplement: Supplementary file [file 20077988]
